# Supplementary material for: The case for a ketogenic diet in the management of kidney disease
Source: PubMed Central journal article supplement — BMJ Open Diabetes Res Care. 2024 Apr 27;12(2):e004101. doi: 10.1136/bmjdrc-2024-004101 (PMC11057262; doi:10.1136/bmjdrc-2024-004101), 2024-04-27
Supplement: bmjdrc-2024-004101supp001.pdf [file bmjdrc-2024-004101supp001.pdf]

**Supplementary Table 1.** Summary of clinical and observational studies assessing the effect of low carbohydrate on kidney function and disease

| Study                                              | Study Details                                                                                                                                                                                                                                                                                                                                                                                                                                                                                                           | Details on Carbohydrate Restriction and Protein Intake                                                                                                                                                                                                                                                                              | Kidney Function Findings                                                                                                                                                                                                                                                                                                                                            |
|----------------------------------------------------|-------------------------------------------------------------------------------------------------------------------------------------------------------------------------------------------------------------------------------------------------------------------------------------------------------------------------------------------------------------------------------------------------------------------------------------------------------------------------------------------------------------------------|-------------------------------------------------------------------------------------------------------------------------------------------------------------------------------------------------------------------------------------------------------------------------------------------------------------------------------------|---------------------------------------------------------------------------------------------------------------------------------------------------------------------------------------------------------------------------------------------------------------------------------------------------------------------------------------------------------------------|
| <b>Clinical Trials including post-hoc analyses</b> |                                                                                                                                                                                                                                                                                                                                                                                                                                                                                                                         |                                                                                                                                                                                                                                                                                                                                     |                                                                                                                                                                                                                                                                                                                                                                     |
| <b>Tay J et al., 2015</b> <sup>113</sup>           | <p>Randomized controlled trial (RCT) comparing a very low-carbohydrate, high-unsaturated fat/low-saturated fat diet (LC, carbohydrate &lt;50g/day; 14% energy) vs. a high-carbohydrate, low-fat diet (LF) on glycaemic control and CVD risk factors in T2D.</p> <p>Both diets were energy matched</p> <p>Follow-up duration 52 weeks</p> <p>Study included overweight and obese adults with type 2 diabetes (T2D)</p> <p>Baseline eGFR (mL/min/per 1.73m<sup>2</sup>) was normal in both groups (LC, 96 and LF, 92)</p> | <p>Carbohydrate intake in LC stayed significantly lower than the LF group. Carbohydrate intake in the LC increased gradually from weeks 0-12 to weeks 37-52.</p> <p>Self-reported protein level and protein intake estimated from 24 hours urinary urea excretion was higher in LC (1.2g/kg/day) group versus LF (0.9g/kg/day).</p> | <p><b>No negative effect on kidney function</b></p> <p>Both intervention groups experienced non-significant decreases in eGFR (LC, -4%; LF, -2%) and albuminuria (LC, -42%; LF, -33%) with no difference between groups.</p> <p>The 2-4% decrease in eGFR is consistent with age-related change in T2D and at 52 weeks, the mean eGFR was still in normal range</p> |
| <b>Tirosh A et al., 2013</b> <sup>116</sup>        | <p>RCT comparing 3 diets. Low fat (LF, restricted calorie with only 30% of the calories from fat), Mediterranean (M, moderate fat, restricted calorie diet) Low carbohydrate (LC, non-restricted calorie diet, with 20g carbohydrate per day during the first 2 month of induction phase and 120g carbohydrate per day during the maintenance phase)</p> <p>Follow-up duration 24 months</p> <p>Study included participants with BMI ≥</p>                                                                              | <p>The LC intervention arm had significantly lower intake of carbohydrate and higher intake of protein than the other two intervention arms (LF and M)</p> <p>Only 8.3% of the LC arm participant had detectable urinary ketone at 24 mos (4.8% LF and 2.8% M participants had detectable urinary ketones)</p>                      | <p><b>Beneficial effect on kidney function</b></p> <p>All three intervention groups reported significant increase in eGFR from baseline but no significant difference between groups. LC, +5.3%; M, +5.2%; LF, +4.0%</p> <p>Among 23 participants who met microalbuminuria criteria at baseline, all three intervention</p>                                         |

|                                               |                                                                                                                         |                                                                                                                                                                           |                                                                                                                                                                                                   |
|-----------------------------------------------|-------------------------------------------------------------------------------------------------------------------------|---------------------------------------------------------------------------------------------------------------------------------------------------------------------------|---------------------------------------------------------------------------------------------------------------------------------------------------------------------------------------------------|
|                                               | 27kg/m <sup>2</sup> and 14% of them had T2D                                                                             |                                                                                                                                                                           | arms had a non-significant decrease in albumin (LC, -37.0 mg/dL; M, -0.4 mg/dL and LF, -52.7mg/dL)                                                                                                |
|                                               | Baseline eGFR (mL/min/per 1.73m <sup>2</sup> ) in all three intervention groups (LC, 71.1; M, 70.2 and LF, 70.3)        |                                                                                                                                                                           | Subgroup analysis among those with moderate CKD stage III at baseline also reported significant increase in eGFR from baseline in the LC and M intervention arms. LC, +10.0%; M, +6.0%; LF, +5.4% |
| <b>Brinkworth GD et al., 2010</b><br>114      | RCT comparing energy-restricted very low carbohydrate diet (LC) and isocaloric conventional high carbohydrate diet (HC) | The LC group consumed significantly less carbohydrate and more protein than the HC arm.                                                                                   | <b>No negative effect on kidney function</b>                                                                                                                                                      |
|                                               | Follow-up duration 52 weeks                                                                                             |                                                                                                                                                                           | No significant changes in serum creatinine and eGFR from baseline to 1 year in both intervention arms                                                                                             |
|                                               | Baseline eGFR (mL/min/per 1.73m <sup>2</sup> ) was normal in both groups (LC, 90 and HC, 83.8)                          |                                                                                                                                                                           |                                                                                                                                                                                                   |
| <b>Friedman AN et al., 2012</b> <sup>93</sup> | RCT comparing low carbohydrate, high protein (LC) and energy restricted low fat (LF) groups.                            | The first 12 weeks, the LC arm limited carbohydrate intake <20g per day. After 12 weeks, participants gradually increased carbohydrate intake at a rate of 5g/d per week. | <b>Beneficial effect on kidney function only at 3 and 12 months</b>                                                                                                                               |
|                                               | Follow-up duration 24 months                                                                                            |                                                                                                                                                                           | LC reported significant decrease in serum creatinine and cystatin C at 3 months and relative increase in creatinine clearance at 3 months that lasted up to 12 months.                            |
|                                               | Study included participants with BMI ranging from 30 to 40 kg/m <sup>2</sup> without T2D                                |                                                                                                                                                                           | Both intervention arms had a significant decrease in urinary albumin excretion at 24 months                                                                                                       |

|                                                 |                                                                                                                                                                                                                                                                                                                                                                                                                                            |                                                                                                                                                                                                                                                    |                                                                                                                                                                                                                                                                                                                                                                                                                                                                                                                                                                                           |
|-------------------------------------------------|--------------------------------------------------------------------------------------------------------------------------------------------------------------------------------------------------------------------------------------------------------------------------------------------------------------------------------------------------------------------------------------------------------------------------------------------|----------------------------------------------------------------------------------------------------------------------------------------------------------------------------------------------------------------------------------------------------|-------------------------------------------------------------------------------------------------------------------------------------------------------------------------------------------------------------------------------------------------------------------------------------------------------------------------------------------------------------------------------------------------------------------------------------------------------------------------------------------------------------------------------------------------------------------------------------------|
| <b>Zainordin NA et al., 2021</b> <sup>115</sup> | <p>RCT comparing very low carbohydrate plus low protein diet (VLCBD) with standard low protein/low salt (Control) diet groups.</p> <p>Follow-up duration 12 weeks</p> <p>Study included individuals with T2D and stable CKD stages 2 or 3</p> <p>Baseline eGFR (mL/min/per 1.73m<sup>2</sup>) were 71.7 in VLCBD arm and 65.0 in control arm</p>                                                                                           | <p>The VLCBD group had significantly lower carbohydrate count and higher daily intake of protein at 6 and 12 weeks compared to control.</p>                                                                                                        | <p><b>No negative effect on kidney function</b></p> <p>No significant decrease in eGFR and worsening of serum creatinine in both intervention group (with no difference between groups)</p> <p>There was a greater decrease in urine microalbumin in the VLCBD group (not significant from baseline) but no change in the control group.</p>                                                                                                                                                                                                                                              |
| <b>Facchini FS et al., 2003</b> <sup>117</sup>  | <p>RCT compared a carbohydrate-restricted, low iron available, polyphenol enriched (CR-LIPE) diet with a control group prescribed a standard protein restricted diet.</p> <p>Mean follow-up duration 3.9 ± 1.8 years (approximately 4 years)</p> <p>Study included individuals with T2D with different levels of renal failures including albuminuria.</p> <p>Baseline eGFR (mL/min) were 64.0 in CR-LIPE arm and 62.0 in control arm.</p> | <p>The CR-LIPE restricted carbohydrate up to 30% and had a protein intake of 25 to 30% (2 to 2.4g/day) of the energy.</p> <p>vs</p> <p>Control diet restricted protein up to 10% (0.8g/day) and had a carbohydrate intake of 65% of the energy</p> | <p><b>Beneficial effect on all-cause mortality and kidney endpoints</b></p> <p>191 patients were enrolled, and 170 patients met the outcome or completed the last follow-up.</p> <p>Doubling of serum creatinine reported in 19 patients on CR-LIPE (21%) and in 31 control patients (39%), relative risk (RR) 0.53 (95% CI 0.33-0.86, p&lt;0.01)</p> <p>All-cause mortality occurred in 8 patients on CR-LIPE (8.8%) and in 14 control subjects (17.7%), RR 0.5 (95% CI 0.2-1.12).</p> <p>Dialysis or renal replacement therapy occurred in 10 patients on CR-LIPE (11.0%) and in 17</p> |

|                                                |                                                                                                                                                                                                                                                                                                                                                            |                                                                            |                                                                                                                                                                                                                                                                                                                                                                                                                                                                                                                                                                                                                                                                                                            |
|------------------------------------------------|------------------------------------------------------------------------------------------------------------------------------------------------------------------------------------------------------------------------------------------------------------------------------------------------------------------------------------------------------------|----------------------------------------------------------------------------|------------------------------------------------------------------------------------------------------------------------------------------------------------------------------------------------------------------------------------------------------------------------------------------------------------------------------------------------------------------------------------------------------------------------------------------------------------------------------------------------------------------------------------------------------------------------------------------------------------------------------------------------------------------------------------------------------------|
| <b>Bruci A et al., 2020</b> <sup>119</sup>     | <p>A single arm, prospective real-life follow-up study on individuals following a very low-calorie ketogenic diet (VLCKD)</p> <p>Follow-up duration 3 months</p> <p>Study included individuals with obesity.</p> <p>Baseline eGFR (mL/min/per 1.73m<sup>2</sup>) was 94.5</p>                                                                              | <p>Ketosis was confirmed each week by measuring urinary ketone levels.</p> | <p>control subjects (21.5%)</p> <p><b>No negative overall effect on kidney function but positive effect observed in individuals with diminished renal function at baseline.</b></p> <p>No significant change in eGFR from baseline to 3 months in the whole cohort</p> <p>In the subgroup analysis after stratifying individuals into normal kidney function, NKF (eGFR<math>\geq</math>90) and mild chronic kidney disease, MCKD (eGFR between 60 to 89) - no significant increase in eGFR reported in the NKF but the MCKD group had a significant 7.7% increase in eGFR at 3 months.</p> <p>27.7% of the participants in the MCKD group normalized their eGFR (eGFR<math>\geq</math>90) at 3 months</p> |
| <b>Friedman AN et al., 2013</b> <sup>118</sup> | <p>A single arm, observational prospective follow-up on individuals following very low calorie ketogenic diet</p> <p>Study only included individuals with known diabetes nephropathy with baseline eGFR &lt;40 mL/min/per 1.73m<sup>2</sup> and urine albumin excretion &gt;30g/day (only six individuals included)</p> <p>Follow-up duration 12 weeks</p> | <p>Carbohydrate intake was restricted to less than 50g/day</p>             | <p><b>Beneficial effect on kidney function</b></p> <p>A significant 12% reduction in serum creatinine and cystatin C. A significant increase in eGFR</p> <p>There was a non-significant 36% decrease in urine albumin excretion</p>                                                                                                                                                                                                                                                                                                                                                                                                                                                                        |

---

**Observational studies**
**Unwin D et al., 2021** <sup>120</sup>

A retrospective chart analysis of routine clinical data from a suburban GP practice where a low carbohydrate diet is prescribed routinely.

n=143 included in the analysis who persisted in the diet and with available data.

Average follow-up duration 30 months

Baseline eGFR (mL/min/per 1.73m<sup>2</sup>) was 85.5

Participants confirmed maintaining the low carbohydrate diet lifestyle

**Beneficial effect on kidney function**

A significant increase in eGFR (2.8%) and decrease in urine albumin creatinine ratio. Serum creatinine also significantly decreased with 88% of individuals showing improvement in the creatinine levels

---

**Mitchell NS et al., 2021** <sup>121</sup>

A retrospective cohort study of an outpatient ketogenic diet provider clinic. Included only patients who had at least two visits with the keto diet provider.

Change in kidney function assessed at 1 year

n=2004 included in the final analysis, which includes

n=823 with baseline eGFR  $\geq$  90 (E1)

n= 881 with baseline eGFR 60-89 (E2)

n=300 with baseline eGFR 30-59 (E3)

Baseline eGFR (mL/min/per 1.73m<sup>2</sup>) of the overall cohort was 84.0

Recommended to restrict carbohydrate <20g and no restriction in protein and fat intake.

No details on adherence reported in the paper.

**Beneficial effect observed in individuals with diminished renal function at baseline.**

Among those in the E1 category with or without T2D, eGFR decreases approximately 4-6 mL/min/1.73m<sup>2</sup> regardless of weight loss categories.

Among those in the E2 category without T2D, eGFR improves approximately 3-4 mL/min/1.73m<sup>2</sup> regardless of weight loss categories. Those in the E2 category and with T2D, eGFR improves 1-2 mL/min/1.73m<sup>2</sup> regardless of weight loss categories.

For those in E3 category without T2D, with at least 5% weight

|                                              |                                                                                                                                                                                                                                                                                                                                                                       |                                                                                                                                                                                                                                                                      |                                                                                                                                                                                                                                                                                                                                                                                                                                    |
|----------------------------------------------|-----------------------------------------------------------------------------------------------------------------------------------------------------------------------------------------------------------------------------------------------------------------------------------------------------------------------------------------------------------------------|----------------------------------------------------------------------------------------------------------------------------------------------------------------------------------------------------------------------------------------------------------------------|------------------------------------------------------------------------------------------------------------------------------------------------------------------------------------------------------------------------------------------------------------------------------------------------------------------------------------------------------------------------------------------------------------------------------------|
|                                              |                                                                                                                                                                                                                                                                                                                                                                       |                                                                                                                                                                                                                                                                      | <p>loss, the eGFR improves 3 mL/min/1.73m<sup>2</sup> and without any weight loss, the eGFR improves 1 mL/min/1.73m<sup>2</sup></p> <p>For those in E3 category and with T2D, no changes in eGFR regardless of degree of weight loss</p>                                                                                                                                                                                           |
| <b>Wilmsen N et al., 2022</b> <sup>122</sup> | <p>A retrospective observational cohort study of participants who enrolled in the Reverse Diabetes 2Now program.</p> <p>Participants with baseline eGFR &lt; 70 mL/min/1.73m<sup>2</sup> were included in the final analysis (n=45)</p> <p>Baseline median eGFR (mL/min/per 1.73m<sup>2</sup>) of those included in the analysis and with available data is 62.0.</p> | <p>Reverse Diabetes 2Now program aims to improve diet quality, sleep and physical activity.</p> <p>Participants were prescribed a restricted carb Mediterranean diet, rcMD.</p> <p>It is not very clear how low carbohydrate was restricted in the intervention.</p> | <p><b>Beneficial effect on kidney</b></p> <p>A significant increase in median eGFR from 62.0 at baseline to 69.0 at 6 months (an average increase of 8.1%). At 12 months (n=22 with available data), median eGFR (63.5) remains stable with no difference from baseline.</p> <p>No changes in urinary albumin creatinine ratio (UACR) at 6 and 12 months. The median UACR was within normal range at baseline, 6 and 12 months</p> |
